# Supplementary material for: Estimation of individual beneficial and adverse effects of intensive glucose control for patients with type 2 diabetes
Source: PubMed Central journal article supplement (PMC6518074; doi:10.1007/s00125-016-4082-5), 2016-09-01

## Electronic Supplementary Material

Estimation of individual beneficial and adverse effects of intensive glucose control for patients with type 2 diabetes, Van der Leeuw et al.

**Table 1.** The use of glucose-lowering drugs at baseline and end of follow-up.

| Glucose-lowering drug             | Baseline                      |                              | End of follow-up              |                              |
|-----------------------------------|-------------------------------|------------------------------|-------------------------------|------------------------------|
|                                   | Intensive control<br>(n=5571) | Standard control<br>(n=5569) | Intensive control<br>(n=4828) | Standard control<br>(n=4741) |
| Gliclazide (modified-release), %* | 7.6                           | 8                            | 90.5                          | 1.6                          |
| Other sulfonylurea, %             | 64.2                          | 63.1                         | 1.9                           | 57.1                         |
| Metformin, %                      | 61                            | 60.2                         | 73.8                          | 67                           |
| Thiazolidinedione, %              | 3.6                           | 3.7                          | 16.8                          | 10.9                         |
| Acarbose, %                       | 9.2                           | 8                            | 19.1                          | 12.6                         |
| Glinide, %                        | 1.8                           | 1.5                          | 1.2                           | 2.8                          |
| Any oral hypoglycaemic drug, %    | 91.3                          | 90.6                         | 93.7                          | 84.4                         |
| Insulin, %                        | 1.5                           | 1.4                          | 40.5                          | 24.1                         |
| None, %                           | 8.7                           | 9.4                          | 1.5                           | 6.4                          |

\*The use of gliclazide (modified release) at baseline in the intensive-control group is reported for the first (registration) visit; at the randomization visit, 99% of patients in this group were given the drug

**Table 2.** Details of the final Cox proportional hazards model for the estimation of death from any cause.

| Variable                                                     | $S_0(5) = 0.9294$        |      |             |      |         |
|--------------------------------------------------------------|--------------------------|------|-------------|------|---------|
|                                                              | Coefficient <sup>¶</sup> | sHR  | 95% CI      |      | p-value |
| Glucose treatment allocation (intensive vs. standard)        | -0.0531                  | 0.95 | 0.84 - 1.07 |      | 0.383   |
| Sex (women vs. men)                                          | -0.5710                  | 0.56 | 0.48 - 0.64 |      | <0.001  |
| Age (per 1 year)                                             | 0.0736                   | 1.08 | 1.07 - 1.09 |      | <0.001  |
| Duration of diabetes (per 1 year)                            | 0.0201                   | 1.02 | 1.01 - 1.03 |      | <0.001  |
| Systolic blood pressure if untreated (per 1 mmHg)            | 0.0010                   | 1.00 | 1.00 - 1.00 |      | 0.518   |
| Systolic blood pressure if treated (per 1 mmHg)              | 0.0017                   | 1.00 | 1.00 - 1.00 |      | 0.245   |
| Non HDL cholesterol (per 1 mmol/l)                           | 0.0641                   | 1.07 | 1.01 - 1.13 |      | 0.020   |
| HbA <sub>1c</sub> (per 1% )                                  | 0.0880                   | 1.09 | 1.05 - 1.14 |      | <0.001  |
| UACR (per 1 mg/mmol log <sub>e</sub> )                       | 0.1369                   | 1.15 | 1.10 - 1.20 |      | <0.001  |
| eGFR (per 1 ml/min increase)                                 | -0.0316                  | 0.97 | 0.95 - 0.99 |      | <0.001  |
| eGFR squared (per 1 ml/min squared)                          | 0.0002                   | 1.00 | 1.00 - 1.00 |      | 0.017   |
| Waist circumference (per 1 cm)                               | 0.0039                   | 1.00 | 1.00 - 1.01 |      | 0.152   |
| Smoking (current vs. never or former)                        | 0.3051                   | 1.37 | 1.15 - 1.63 |      | <0.001  |
| History of microvascular disease (yes vs. no)                | 0.3453                   | 1.42 | 1.20 - 1.70 |      | <0.001  |
| History of macrovascular disease (yes vs. no)                | 0.3711                   | 1.46 | 1.29 - 1.66 |      | <0.001  |
| Educational attainment (>15y at completion of education)     | -0.3389                  | 0.71 | 0.62 - 0.81 |      | <0.001  |
| Region                                                       |                          |      |             |      |         |
| Eastern Europa                                               | 0.4225                   | 1.54 | 1.30        | 1.83 | <0.001  |
| Asia                                                         | 0.1116                   | 1.12 | 0.95        | 1.33 | 0.188   |
| BP treatment allocation (perindopril/indapamide vs. placebo) | -0.1042                  | 0.90 | 0.80 - 1.02 |      | 0.087   |

$S_0(5)$ = 5-year baseline survival, sHR: subdistribution hazard ratio, HDL: high density lipoprotein, UACR: urinary albumin/creatinin ratio, eGFR: estimated glomerular filtration rate (CKD-EPI equation). <sup>¶</sup> Coefficients were penalized by a shrinkage factor of 0.975 to increase external validity, whereas unbiased HRs and statistics were derived from an unpenalised Fine and Gray model. 5-year death risk (%) =  $(1 - S_0(5)^{\exp(A \cdot 5.255)}) \times 100\%$ . A is the sum, over all variables in the model, of the patient's specific value times the corresponding coefficient.

**Table 3.** Baseline characteristics of the ADVANCE population after stratification to net positive and negative treatment effect.

| Characteristic                                                          | Net positive effect*<br>(n=9,488) | Net negative effect*<br>(n=1,652) |
|-------------------------------------------------------------------------|-----------------------------------|-----------------------------------|
| Female, n(%)                                                            | 3526 (38)                         | 1107 (67)                         |
| Age (years) <sup>a</sup>                                                | 65 (6)                            | 68 (6)                            |
| Duration of diabetes (years) <sup>a</sup>                               | 8 (6)                             | 10 (7)                            |
| History of microvascular disease, n(%)                                  | 854 (9)                           | 301 (18)                          |
| History of macrovascular disease, n(%)                                  | 3179 (34)                         | 411 (25)                          |
| Region                                                                  |                                   |                                   |
| Established market economies, n(%)                                      | 3853 (41)                         | 1003 (61)                         |
| Eastern Europe, n(%)                                                    | 2094 (22)                         | 48 (3)                            |
| Asia, n(%)                                                              | 3535 (37)                         | 601 (36)                          |
| <i>Blood glucose control</i>                                            |                                   |                                   |
| Fasting blood glucose (mmol/l) <sup>a</sup>                             | 8.2 (2.6)                         | 9.9 (3.4)                         |
| Serum haemoglobin A <sub>1c</sub> concentration (%) <sup>a</sup>        | 7.3 (1.4)                         | 8.8 (1.9)                         |
| Serum haemoglobin A <sub>1c</sub> concentration (mmol/mol) <sup>a</sup> | 56 (15)                           | 73 (21)                           |
| <i>Other risk factors</i>                                               |                                   |                                   |
| Systolic blood pressure (mmHg) <sup>a</sup>                             | 146 (21)                          | 141 (22)                          |
| Diastolic blood pressure (mmHg) <sup>a</sup>                            | 81 (11)                           | 77 (11)                           |
| History of treated hypertension, n(%)                                   | 6855 (72)                         | 800 (48)                          |
| Non HDL-cholesterol (mmol/l) <sup>a</sup>                               | 4.0 (1.2)                         | 3.7 (1.0)                         |
| Triacylglycerol (mmol/l) <sup>b</sup>                                   | 1.6 (1.2 - 2.3)                   | 1.6 (1.2 - 2.2)                   |
| Urinary albumin:creatinine ratio (mg/mmol) <sup>b</sup>                 | 1.8 (0.9 - 4.7)                   | 1.1 (0.1 - 2.7)                   |
| eGFR (mL/min/1.73m <sup>2</sup> ) <sup>b</sup>                          | 76 (63 - 89)                      | 67 (56 - 81)                      |
| Current smoking, n(%)                                                   | 1416 (15)                         | 266 (16)                          |
| Waist circumference (cm) <sup>a</sup>                                   | 100 (13)                          | 92 (12)                           |
| Educational attainment (age >15 y at completion) <sup>a</sup>           | 6416 (68)                         | 705 (43)                          |

<sup>a</sup> mean ± standard deviation; <sup>b</sup> median with interquartile range; eGFR: estimated glomerular filtration rate by CKD-EPI formula; HDL: high density lipoprotein. \*Net positive/negative treatment effect: ARR of major vascular events > or ≤ ARI of severe hypoglycaemia (assuming equal weights)

**Figure 1. Calibration plot.** Predicted versus observed 5-year risk of death from any cause in ADVANCE participants.

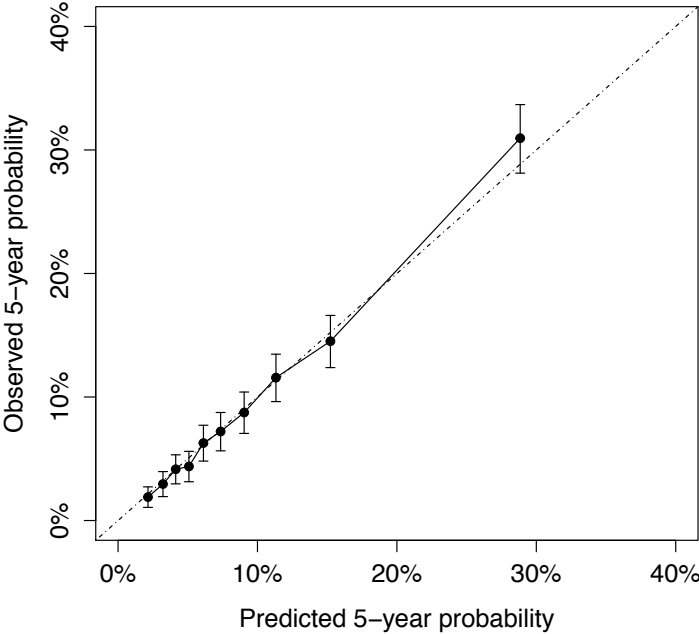

Supplement: 125_2016_4082_MOESM1_ESM.pdf [file 125_2016_4082_MOESM1_ESM.pdf]
